# Supplementary material for: Comprehensive survey of transposon mPing insertion sites and transcriptome analysis for identifying candidate genes controlling high protein content of rice
Source: Front Plant Sci. 2022 Sep 2;13:969582. doi: 10.3389/fpls.2022.969582 (PMC9479144; doi:10.3389/fpls.2022.969582)
Supplement: Supplementary file 1 [file Table_1.XLSX]

## Sheet: Table_S1
Supplemental Table 1. Primers used for library construction.
Experimental process	Primer name	Sequence
Adaptor ligation	Forked_Type1a	aatagggctcgagcggcagctattaatagtaCt
	Forked_Comb	GTACTATTAATAGCATCTTCGTTCGTCGAT
Primary PCR	mPing_1st	TATTTTGGGTAGCCGTGCAATG
	AP2-Type1	AATAGGGCTCGAGCGGC
Nested PCR	D501	AATGATACGGCGACCACCGAGATCTACACTATAGCCTGTGCAATGACACTAGCCATTGTGACTGGCCTWA
	D502	AATGATACGGCGACCACCGAGATCTACACATAGAGGCGTGCAATGACACTAGCCATTGTGACTGGCCTWA
	D503	AATGATACGGCGACCACCGAGATCTACACCCTATCCTGTGCAATGACACTAGCCATTGTGACTGGCCTWA
	D701	CAAGCAGAAGACGGCATACGAGATCGAGTAATGGGCTCGAGCGGCAGCTATTAATAGTACT
	D702	CAAGCAGAAGACGGCATACGAGATTCTCCGGAGGGCTCGAGCGGCAGCTATTAATAGTACT
	D703	CAAGCAGAAGACGGCATACGAGATAATGAGCGGGGCTCGAGCGGCAGCTATTAATAGTACT
	D704	CAAGCAGAAGACGGCATACGAGATGGAATCTCGGGCTCGAGCGGCAGCTATTAATAGTACT
	D705	CAAGCAGAAGACGGCATACGAGATTTCTGAATGGGCTCGAGCGGCAGCTATTAATAGTACT
	D706	CAAGCAGAAGACGGCATACGAGATACGAATTCGGGCTCGAGCGGCAGCTATTAATAGTACT
	D707	CAAGCAGAAGACGGCATACGAGATAGCTTCAGGGGCTCGAGCGGCAGCTATTAATAGTACT
	D708	CAAGCAGAAGACGGCATACGAGATGCGCATTAGGGCTCGAGCGGCAGCTATTAATAGTACT
	D709	CAAGCAGAAGACGGCATACGAGATCATAGCCGGGGCTCGAGCGGCAGCTATTAATAGTACT
	D710	CAAGCAGAAGACGGCATACGAGATTTCGCGGAGGGCTCGAGCGGCAGCTATTAATAGTACT
	D711	CAAGCAGAAGACGGCATACGAGATGCGCGAGAGGGCTCGAGCGGCAGCTATTAATAGTACT
	D712	CAAGCAGAAGACGGCATACGAGATCTATCGCTGGGCTCGAGCGGCAGCTATTAATAGTACT
Underlined sequences represent barcode sequences.
a When a C-T bond was present at the terminus, oxygen atoms of the phosphate group of the oligonucleotide with normal phosphodiester bonds were exchanged for sulfate atoms to produce phosphorothioate oligonucleotides (S-oligo).
b Primers were modified by the addition of a phosphate group at the 5' terminal.

## Sheet: Table_S2
Supplemental Table 2. Primer combinations for library construction.
Line	P5 primer	P7 primer
HP1-3	D501	D701
HP1-7	D501	D702
HP2-4	D501	D703
HP3-3	D501	D704
HP4-1	D501	D705
HP4-2	D501	D706
HP4-3	D501	D707
HP4-4	D501	D708
HP4-8	D501	D709
HP5-7	D501	D710
HP6-7	D501	D711
HP6-10	D501	D712
HP7-5	D502	D701
HP8-4	D502	D702
HP9-2	D502	D703
HP9-3	D502	D704
HP9-5	D502	D705
HP9-7	D502	D706
HP9-8	D502	D707
HP9-9	D502	D708
HP10-5	D502	D709
C1-2	D502	D710
C2-2	D502	D711
C3-1	D502	D712
C3-2	D503	D701

## Sheet: Table_S3
Supplementary Table 3. Primers used for the validation of mPing insertion sites.
Name of mPing insertion site	Forward primer	Reverse primer
Cl011	atggaggaagaggaggaagg	cgatcgatacatggatgctg
Cl254	atccagttgcatgtgtgcat	tggtgtttgtattggaagagtagtg
Cl454	tgacagcatcccagctacag	gagtggcttcttggttttcg
Cl005	aggacaaagcttcacgcagt	tggtttcatcaagcagttgg
Cl119	aaagccatagaagttgtcatgc	gaaactcgtgtttgcccttt
Cl394	ccgccaccactagcttgtat	aaagtgcaccacccagctat
Cl164	ttcgctttgggctcctacta	tggaagaatcgaatcgagga
Cl529	ccgatgtgatagggaacttga	accgctttgacccctattct
Cl213	ctgcacacaaactccaagaaa	tgattttaagtggctgagagca

## Sheet: Table_S4
Supplementary Table 4. Primers used for qPCR.
Target gene	Forward primer	Reverse primer
Os05g0331800	TCCTGCTACAGCAACAGGTG	AGCTGTTGCCAGACTTGGTT
Os02g0242600	GGGGAGAAGAGATTGGTGCT	GCCTTGGGTTTAAATCACCTC
Os05g0499100	CGTCGGAGGAGGGCTACTA	GCTATGAGGCAAGCCAGCTA
Actin	GCTATGTACGTCGCCATCCA	GCTGACACCATCACCAGAGT

## Sheet: Table_S5
Supplemental Table 5. The number of reads in each line.
Line	Read number
HP1-3	544991
HP1-7	619337
HP2-4	687994
HP3-3	774388
HP4-1	623978
HP4-2	723973
HP4-3	615824
HP4-4	663953
HP4-8	583957
HP5-7	684993
HP6-7	654503
HP6-10	552510
HP7-5	539104
HP8-4	644285
HP9-2	663093
HP9-3	839733
HP9-5	642740
HP9-7	799924
HP9-8	720594
HP9-9	634755
HP10-5	600012
C1-2	626971
C2-2	699784
C3-1	558225
C3-2	533443
Total	16233064

## Sheet: Table_S6
Supplemental Table 6. Summary of reads in the data analysis.
Analysis	No. of reads	Ratio (%)	No. of collapsed reads (more than 10)	No. of clusters
Raw data	16233064	100	-
Adaptor removal	16210805	99.9	41184
QV (≥30) filtering	4494491	27.6873	24856
Outlier filtering	2995488	18.453	10044
BLAT clustering				3268

## Sheet: Table_S7
Supplemental Table 7. The number of mPing insertion sites detected, based on a clustering analysis for each line.
Line	The number of mPing insertion sites by clustering analysis
HP1-3	526
HP1-7	508
HP2-4	610
HP3-3	571
HP4-1	523
HP4-2	547
HP4-3	581
HP4-4	583
HP4-8	554
HP5-7	589
HP6-7	571
HP6-10	594
HP7-5	495
HP8-4	560
HP9-2	571
HP9-3	562
HP9-5	655
HP9-7	639
HP9-8	638
HP9-9	632
HP10-5	602
HP_C1-2	566
HP_C2-2	574
HP_C3-1	581
HP_C3-2	495
Average	573.08

## Sheet: Table_S8
Supplemental Table 8. Summary of mPing insertion sites on each chromosome in the three lines.
Chr.	C3-1							HP5-7							HP7-5
	Inside gene		Near gene		Intergenic		Total number	Inside gene		Near gene		Intergenic		Total number	Inside gene		Near gene		Intergenic		Total number
	Number	Ratio(%)	Number	Ratio(%)	Number	Ratio(%)		Number	Ratio(%)	Number	Ratio(%)	Number	Ratio(%)		Number	Ratio(%)	Number	Ratio(%)	Number	Ratio(%)
Chr01	16	18.2	49	55.7	23	26.1	88	13	15.3	54	63.5	18	21.2	85	12	16	43	57.3	20	26.7	75
Chr02	7	11.5	37	60.7	17	27.9	61	7	10.8	42	64.6	16	24.6	65	3	6.1	35	71.4	11	22.4	49
Chr03	14	18.7	42	56	19	25.3	75	14	19.2	40	54.8	19	26	73	10	18.9	28	52.8	15	28.3	53
Chr04	5	10.2	28	57.1	16	32.7	49	6	12.2	27	55.1	16	32.7	49	6	13	25	54.3	15	32.6	46
Chr05	6	13.6	22	50	16	36.4	44	6	13	21	45.7	19	41.3	46	6	16.7	18	50	12	33.3	36
Chr06	6	11.8	26	51	19	37.3	51	4	7.8	29	56.9	18	35.3	51	4	9.3	21	48.8	18	41.9	43
Chr07	6	13	24	52.2	16	34.8	46	7	16.3	23	53.5	13	30.2	43	6	15.4	19	48.7	14	35.9	39
Chr08	9	25	17	47.2	10	27.8	36	9	25	18	50	9	25	36	9	23.7	17	44.7	12	31.6	38
Chr09	6	15.8	15	395	17	44.7	38	6	14	19	44.2	18	41.9	43	6	17.1	13	37.1	16	45.7	35
Chr10	2	7.4	15	55.6	10	37	27	1	3.4	18	62.1	10	34.5	29	2	9.5	13	61.9	6	28.6	21
Chr11	4	13.3	13	43.3	13	43.3	30	4	12.1	15	45.5	14	42.4	33	3	10	12	40	15	50	30
Chr12	2	8	18	72	5	20	25	4	14.8	17	63	6	22.2	27	3	15	12	60	5	25	20
Total	83	14.6***	306	53.7***	181	31.8**	570	81	14.0***	323	55.7***	176	30.3**	580	70	14.4***	256	52.8***	159	32.8**	485
A statistically significant difference compared to the values of the proportion in the rice genome (from Supplemental Table 9) was inferred from Student’s t-test (** P < 0.01, and *** P < 0.001).

## Sheet: Table_S9
Supplemental Table 9. The proportion of inside genes, near genes, and intergenic regions in the rice reference genome.
Chromosome	Inside gene		Near gene		Intergenic region		Total length (bp)
	Length (bp)	Ratio (%)	Length (bp)	Ratio (%)	Length (bp)	Ratio (%)
Chr01	14166332	32.7	14927462	34.5	14177129	32.8	43270923
Chr02	11661295	32.4	12132469	33.8	12143486	33.8	35937250
Chr03	12452448	34.2	12550064	34.5	11411307	31.3	36413819
Chr04	9083162	25.6	10169910	28.6	16249622	45.8	35502694
Chr05	8003051	26.7	9221359	30.8	12734024	42.5	29958434
Chr06	8316693	26.6	9821546	31.4	13110548	42	31248787
Chr07	7743850	26.1	9097543	30.6	12856228	43.3	29697621
Chr08	6999943	24.6	8462405	29.8	12980674	45.6	28443022
Chr09	5704341	24.8	6508168	28.3	10800211	46.9	23012720
Chr10	5681231	24.5	7074724	30.5	10451332	45	23207287
Chr11	6945544	23.9	8368419	28.8	13707143	47.2	29021106
Chr12	6025274	21.9	7257659	26.4	14248923	51.8	27531856
Total	102783164	27.5	115591728	31	154870627	41.5	373245519

## Sheet: Table_S10
Supplemental Table 10. Detailed information of mPing insertion sites inside or near genes.
Line	Inside gene					Near gene
	5'UTR	Exon	Intron	3' UTR	Total	Upstream	Downstream	Total
C3-1	8	16	38	21	83	202	104	306
HP5-7	8	13	35	25	81	209	114	323
HP7-5	7	13	28	22	70	167	89	256

[truncated: 3 more sheets: Table_S11, Table_S12, Table_S13]
